# Supplementary material for: Performance enhancement of planar heterojunction perovskite solar cells by n-doping of the electron transporting layer
Source: Royal Society of Chemistry journal article supplement (doi:10.1039/c5cc05253j), 2015-01-01
Supplement: c5cc05253j1.pdf [file c5cc05253j1.pdf]

## Supplementary Information

### Performance enhancement of planar heterojunction perovskite solar cells by *n*-doping of electron transporting layer

Shin Sung Kim, Seunghwan Bae, and Won Ho Jo\*

Department of Materials Science and Engineering, Seoul National University, 1 Gwanak-ro,  
Gwanak-gu, Seoul 151-744, Korea. E-mail: whjpoly@snu.ac.kr

#### Materials and Characterization

CH<sub>3</sub>NH<sub>3</sub>I and DMBI were synthesized by following the methods reported in the literature.<sup>1,2</sup> PbI<sub>2</sub> was purchased from Sigma-Aldrich. Poly(3,4-ethylenedioxythiophene):poly(styrenesulfonate) (PEDOT:PSS) (Clevious P VP AI 4083) was purchased from H. C. Stark and passed through a 0.45 μm PVDF syringe filter before spin-coating. PCBM was obtained from Nano-C. The absorption spectra were obtained by an UV-Vis spectrophotometer (Lambda 25, Perkin Elmer). UPS measurement was performed using a hemispherical electron energy analyzer (RESOLVE 120, PSP). The base pressure of analysis chamber was maintained under low 10<sup>-9</sup> Torr. He I (*hν* = 21.22 eV) discharge lamp was used as an excitation source with sample bias of -15 and -10 V for secondary electron cutoff and valence band region, respectively. Fermi level was calibrated through Ar<sup>+</sup>-sputtered clean Au. The electrical conductivity was measured with device configuration of glass substrate/PCBM or PCBM:DMBI/Au. PCBM or PCBM:DMBI solution was spin-coated on the top of pre-cleaned glass followed by thermal deposition of Au electrode (80 nm thick) in a vacuum below 10<sup>-7</sup> Torr. The electrical conductivity was measured in N<sub>2</sub>-filled glove box by a probe

station with a computer-controlled Keithley 4200 source measurement unit. Devices for electrical conductivity measurement had a channel length of 50  $\mu\text{m}$  and a channel width of 1 mm. Film thickness was measured by AFM measurement.  $J$ - $V$  curves of photovoltaic cells were obtained using the Keithley 4200 source measurement unit under AM 1.5G (100  $\text{mW cm}^{-2}$ ) simulated by an Oriel solar simulator (Oriel 91160A). The light intensity was calibrated using a NREL-certified photodiode prior to each measurement. The EQE spectra were obtained using Polaronix K3100 IPCE measurement system (McScience). The light intensity at each wavelength was calibrated with a standard single-crystal Si cell.

### **Device Fabrication**

The configuration of the solar cell device used in this work is glass/ITO/PEDOT:PSS/ $\text{CH}_3\text{NH}_3\text{PbI}_3$ /PCBM or PCBM:DMBI/Ca/Al. The ITO-coated glass was cleaned with acetone and isopropyl alcohol for 30 min each. After complete drying, the ITO-coated glass was treated with UV-ozone for 15 min. A 40 nm thick PEDOT:PSS was spin-coated on the ITO-coated glass at 3000 rpm for 40 s and annealed at 150  $^\circ\text{C}$  for 30 min in ambient condition. Then, substrates were transferred to  $\text{N}_2$ -filled glove box for further processing. For the perovskite layer, a 1:1 ratio of  $\text{CH}_3\text{NH}_3\text{I}:\text{PbI}_2$  was dissolved in DMSO. The precursor solution was spin-coated onto the PEDOT:PSS layer at 3000 rpm. The substrate was immediately transferred onto a hot plate and heated at 110  $^\circ\text{C}$  for 30 s. For the ETL, various ratios of PCBM/DMBI were dissolved in chloroform and then spin-coated on  $\text{CH}_3\text{NH}_3\text{PbI}_3$  layer at 3000 rpm. Finally, Ca (40 nm) and Al (120 nm) as top electrode were thermally deposited on the ETL under  $10^{-6}$  Torr. The device area is 0.1  $\text{cm}^2$ .

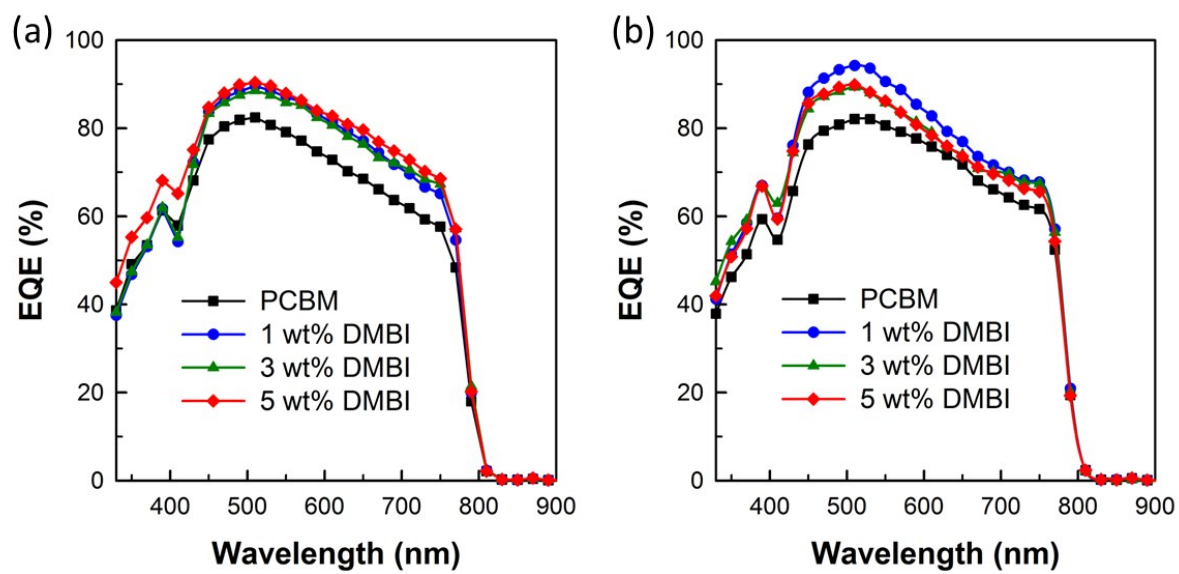

**Fig. S1** EQE spectra of devices with (a) thin ETL and (b) thick ETL which are doped with various DMBI concentrations.

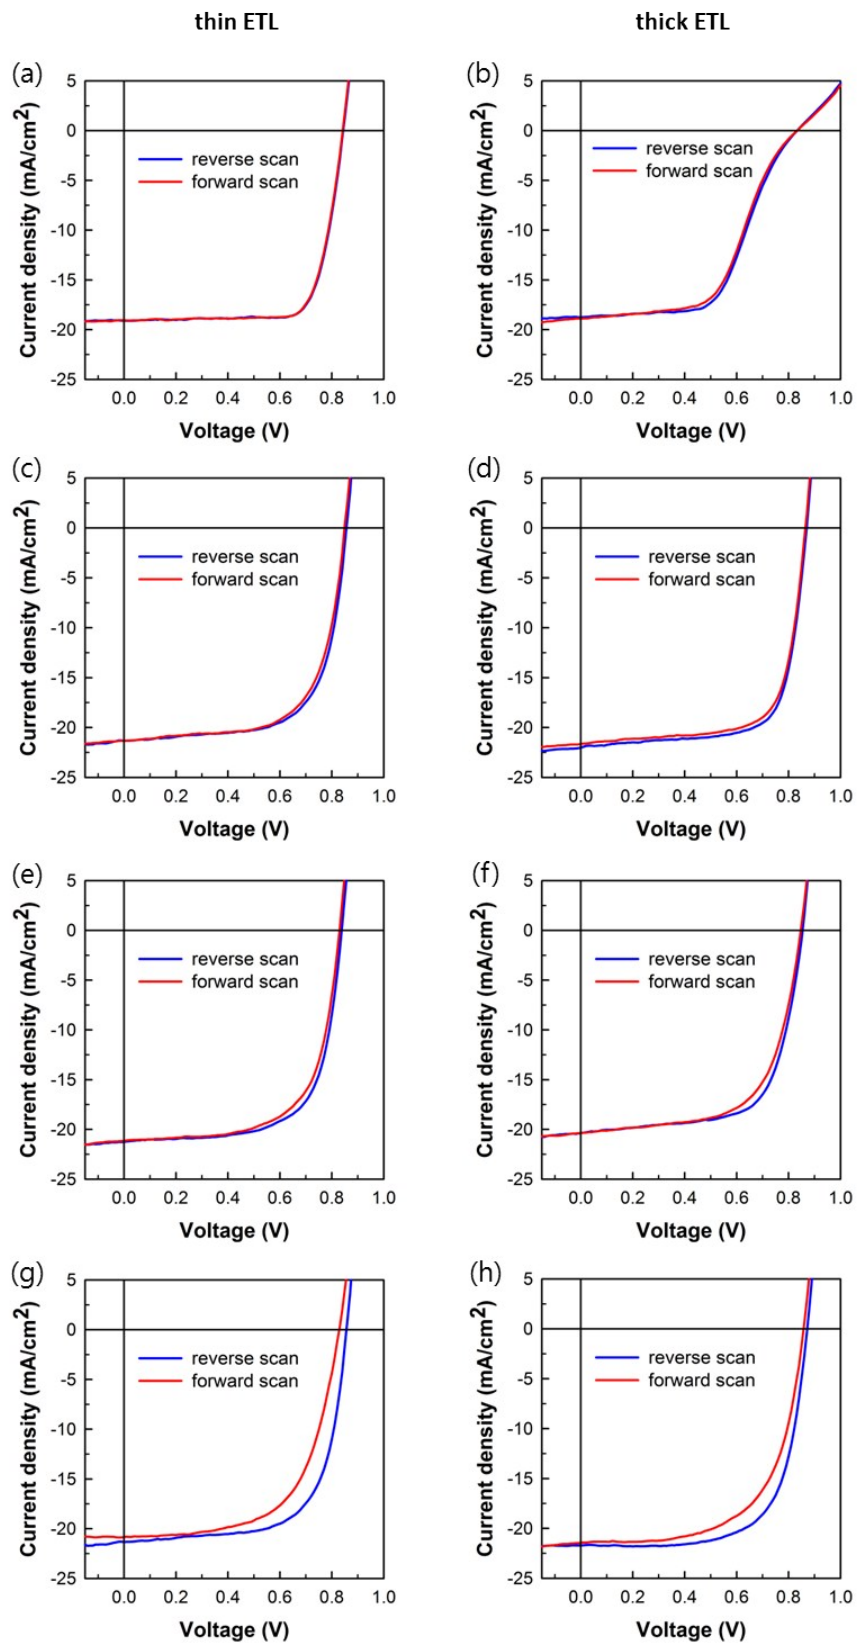

**Fig. S2** Hysteresis curves for devices with (a), (b) pure PCBM, (c), (d) 1 wt% doped PCBM, (e), (f) 3 wt% doped PCBM, (g), (h) 5 wt% doped PCBM.

**Table S1.** Average device parameters and their standard deviations based on at least 10 devices.

| Solution conc. <sup>a</sup><br>(mg/mL) | Dopant conc. of ETL | $J_{SC}^b$<br>(mA cm <sup>-2</sup> ) | $V_{OC}$<br>(V) | FF        | PCE (%)  | $R_{sh}^c$<br>( $\Omega$ cm <sup>2</sup> ) | $R_s^c$<br>( $\Omega$ cm <sup>2</sup> ) |
|----------------------------------------|---------------------|--------------------------------------|-----------------|-----------|----------|--------------------------------------------|-----------------------------------------|
| 10                                     | Pure PCBM           | 18.2±1.1 (18.2)                      | 0.82±0.05       | 0.72±0.05 | 11.0±1.0 | 1.42×10 <sup>3</sup>                       | 3.52                                    |
| 10                                     | 1 wt% DMBI          | 20.3±0.8 (20.0)                      | 0.84±0.02       | 0.70±0.05 | 12.1±0.8 | 9.97×10 <sup>2</sup>                       | 3.60                                    |
| 10                                     | 3 wt% DMBI          | 20.3±1.3 (20.0)                      | 0.83±0.03       | 0.67±0.04 | 11.1±1.0 | 5.88×10 <sup>2</sup>                       | 3.62                                    |
| 10                                     | 5 wt% DMBI          | 20.5±1.2 (20.6)                      | 0.83±0.03       | 0.65±0.05 | 11.1±0.9 | 4.01×10 <sup>2</sup>                       | 3.85                                    |
| 20                                     | Pure PCBM           | 18.4±0.9 (18.6)                      | 0.82±0.04       | 0.52±0.07 | 7.9±1.2  | 4.11×10 <sup>2</sup>                       | 35.1                                    |
| 20                                     | 1 wt% DMBI          | 20.6±0.8 (20.6)                      | 0.86±0.02       | 0.69±0.05 | 12.2±0.7 | 5.04×10 <sup>2</sup>                       | 3.71                                    |
| 20                                     | 3 wt% DMBI          | 20.0±0.7 (19.9)                      | 0.84±0.03       | 0.69±0.03 | 11.2±0.7 | 5.35×10 <sup>2</sup>                       | 3.96                                    |
| 20                                     | 5 wt% DMBI          | 19.9±1.0 (19.8)                      | 0.84±0.05       | 0.67±0.04 | 11.6±1.0 | 5.17×10 <sup>2</sup>                       | 4.24                                    |

<sup>a</sup>10 and 20 mg/mL chloroform solutions are used for fabrication of 50 and 105 nm thick ETL, respectively.

<sup>b</sup> $J_{SC}$  values calculated from EQE spectra are indicated in parenthesis.

<sup>c</sup>The series and shunt resistance were calculated by the slopes of  $J$ - $V$  curves.

## References

1. B. D. Naab, S. Guo, S. Olthof, E. G. B. Evans, P. Wei, G. L. Millhauser, A. Kahn, S. Barlow, S. R. Marder and Z. Bao, *J. Am. Chem. Soc.*, 2013, **135**, 15018-15025.
2. J. H. Heo, S. H. Im, J. H. Noh, T. N. Mandal, C. -S. Lim, J. A. Chang, Y. H. Lee, H. -J. Kim, A. Sarkar, M. K. Nazeeruddin, M. Grätzel and S. I. Seok, *Nat. Photonics*, 2013, **7**, 486-491.
